# Supplementary material for: Enhanced electro-active phase in a luminescent P(VDF–HFP)/Zn2+ flexible composite film for piezoelectric based energy harvesting applications and self-powered UV light detection
Source: Royal Society of Chemistry journal article supplement (doi:10.1039/c7cp01714f), 2017-01-01
Supplement: c7cp01714f1.pdf [file c7cp01714f1.pdf]

**Electronic Supplementary Information (ESI)**

**Enhanced Electro-active Phase in Luminescent P(VDF-HFP)/Zn<sup>2+</sup> Flexible Composite Film for Piezoelectric Based Energy Harvesting Applications and Self-Powered UV Light Detection**

Prakriti Adhikary and Dipankar Mandal\*

Organic Nano-Piezoelectric Device Laboratory, Department of Physics, Jadavpur University,  
Kolkata 700032, India

**\*Corresponding Author**

Dr. Dipankar Mandal

E-mail: [dipankar@phys.jdvu.ac.in](mailto:dipankar@phys.jdvu.ac.in), [dpkrmandal@gmail.com](mailto:dpkrmandal@gmail.com)

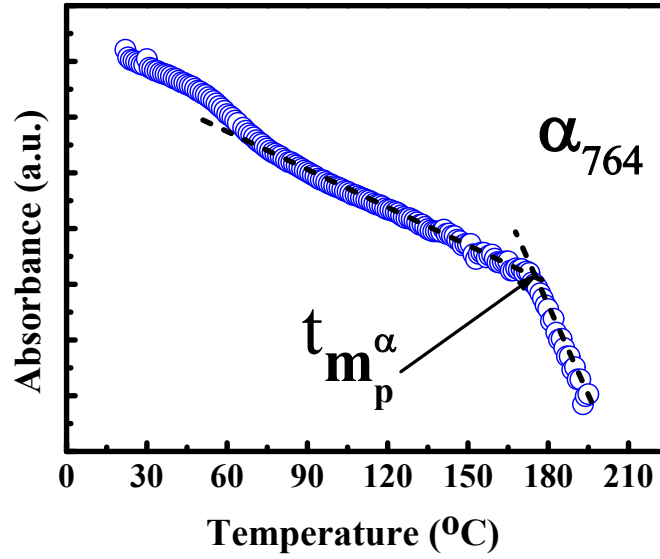

**Fig. S1** The absorbance intensity of  $\alpha$ - ( $\alpha_{764}$ ) phase appeared at  $764 \text{ cm}^{-1}$  in HFP film vs. scanning temperature plot for representing peak melting temperature.

**S1.  $\chi_\alpha$ ,  $\chi_\beta$  and  $\chi_\gamma$  calculation:**

As HFP film composed of both  $\alpha$ - and  $\gamma$ - phase the values of  $\chi_\alpha$  and  $\chi_\gamma$  for the respective crystalline phases are calculated as follows,

$$\chi_\alpha = \chi_c \times \frac{\sum A_\alpha}{\sum A_\alpha + \sum A_\gamma} \% , \text{ and} \quad (\text{S1})$$

$$\chi_\gamma = \chi_c \times \frac{\sum A_\gamma}{\sum A_\alpha + \sum A_\gamma} \% , \quad (\text{S2})$$

Where,  $\sum A_\alpha$  and  $\sum A_\gamma$  describe partial areas in XRD peaks in the  $\alpha$ - and  $\gamma$ - phases respectively.<sup>S1, S2</sup>

On the other hand as  $\text{Zn}^{2+}$ - HFP film composed of both  $\beta$ - and  $\gamma$ - phase the values of  $\chi_\beta$  and  $\chi_\gamma$  for the respective crystalline phases are calculated as follows,

$$\chi_{\beta} = \chi_c \times \frac{\sum A_{\beta}}{\sum A_{\beta} + \sum A_{\gamma}} \%, \text{ and} \quad (\text{S3})$$

$$\chi_{\gamma} = \chi_c \times \frac{\sum A_{\gamma}}{\sum A_{\beta} + \sum A_{\gamma}} \%, \quad (\text{S4})$$

Where,  $\sum A_{\beta}$  and  $\sum A_{\gamma}$  describe partial areas in XRD peaks in the  $\beta$ - and  $\gamma$ -phases respectively.

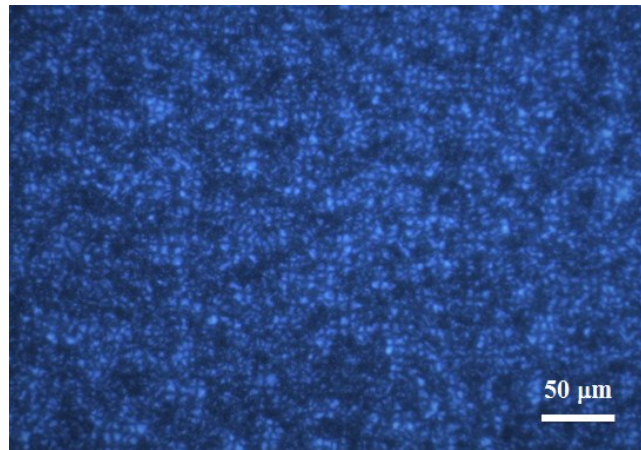

**Fig. S2** Polarized optical microscopy (POM) image of the HFP film under cross polarizer.

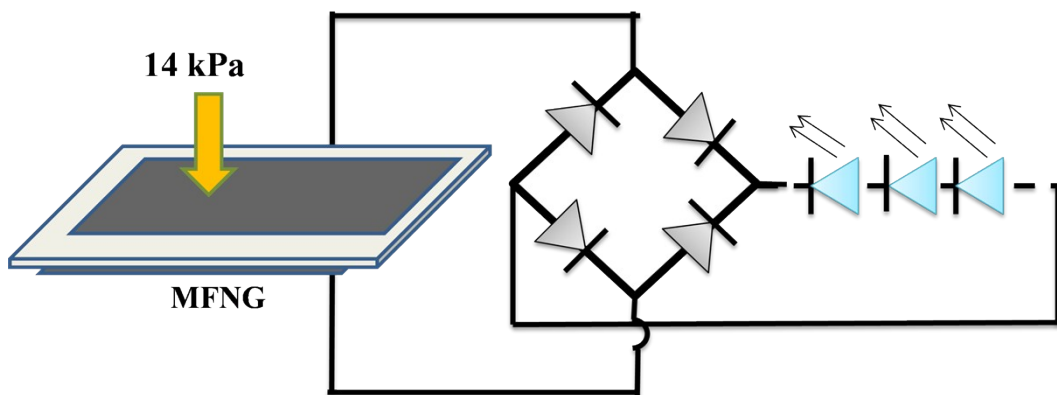

**Fig. S3** Circuit diagram for representing the illumination of blue LEDs under repetitive finger touch and release motion (applied pressure amplitude  $\sim 14$  kPa)

## References

S1 P. Adhikary, S. Garain, S. Ram and D. Mandal, *J. Polym. Sci. B: Polym. Phys.*, 2016, **54**, 2335–2345.

S2 S. Garain, T. K. Sinha, P. Adhikary, K. Henkel, S. Sen, S. Ram, C. Sinha, D. Schmeißer and D. Mandal, *ACS Appl. Mater. Interfaces*, 2015, **7**, 1298–1307.
